# Supplementary material for: Comparative Analysis Based on Transcriptomics and Metabolomics Data Reveal Differences between Emmer and Durum Wheat in Response to Nitrogen Starvation
Source: MDPI journal article supplement (doi:10.3390/ijms22094790), 2021-04-30
Supplement: s1 [file s1]

**Table S7.** Putative functions of common DEGs in both tetraploid wheats with central roles in either of emmer-specific and durum wheat-specific networks.

| DEGs                | up/down     | metabolites                                                                                                                                                                                                                      | group                         | Putative function description                                                  | Orthologues | Central role emmer | Central role durum wheat |
|---------------------|-------------|----------------------------------------------------------------------------------------------------------------------------------------------------------------------------------------------------------------------------------|-------------------------------|--------------------------------------------------------------------------------|-------------|--------------------|--------------------------|
| Traes_1BL_AAC4D956E | <i>down</i> | Aconitic acid, aspartic acid, citric acid, fumaric acid, glutamic acid, maltitol, valine                                                                                                                                         | C metabolism (glycolysis)     | Pyruvate, phosphate dikinase 1(PPDK) (EC 2.7.9.1)                              | AT4G15530   | <b>x</b>           |                          |
| Traes_2AL_F1C4FF20C | <i>down</i> | Citric acid, glutamic acid, maltitol, valine                                                                                                                                                                                     | Fatty acid metabolism         | Lecithin-cholesterol acyltransferase-like 4 (EC 2.3.1.-)                       | AT4G19860   | <b>x</b>           |                          |
| Traes_1AL_053F6B12B | <i>up</i>   | Alanine, aspartic acid, b-alanine, fumaric acid, glutamic acid, isocitric acid, isomaltose, malic acid, maltose-turanose, maltitol, quinic acid, ribose, saccharic acid, serine, shikimic acid, succinic acid, threonine, valine | C metabolism (photosynthesis) | Chlorophyll synthase (CHLG) (EC 2.5.1.62)                                      | AT3G51820   | <b>x</b>           |                          |
| Traes_1AL_FE1097B22 | <i>up</i>   | Maltitol                                                                                                                                                                                                                         | Others                        | Tyrosine--tRNA ligase, chloroplastic/mitochondrial (EC 6.1.1.1)                | AT3G02660   | <b>x</b>           |                          |
| Traes_2AS_F485758C1 | <i>up</i>   | Citric acid, glutamic acid, maltitol, valine                                                                                                                                                                                     | C metabolism (glycolysis)     | Pyruvatedehydrogenase E1 component subunit alpha-3 (PDH-E1 ALPHA) (EC 1.2.4.1) | AT1G01090   | <b>x</b>           |                          |
| Traes_2BS_959A4E58A | <i>up</i>   | Citric acid, glutamic acid, maltitol, valine                                                                                                                                                                                     | Kinases                       | Fructokinase-like 2 (FLN 2)                                                    | AT1G69200   | <b>x</b>           |                          |
| Traes_4AL_45E27280D | <i>up</i>   | Alanine, serine, valine, maltitol                                                                                                                                                                                                | Amino acid metabolism         | Cysteine desulfurase 1 (NIFS) (EC 2.8.1.7)                                     | AT1G08490   | <b>x</b>           |                          |
| Traes_3AS_D097872BE | <i>up</i>   | Aconitic acid, alanine, aspartic acid, fumaric acid, glutamic acid, malic acid, maltitol, valine                                                                                                                                 | Transcription factors         | DEAD-box ATP-dependent RNA helicase 39 (EC 3.6.4.13)                           | AT4G09730   | <b>x</b>           |                          |
| Traes_6AS_FD8F6B539 | <i>up</i>   | Maltitol, valine                                                                                                                                                                                                                 | Stress                        | Rhodanese-like domain-containing protein 7 (STR 7)                             | AT2G40760   | <b>x</b>           |                          |
| Traes_7AL_A1ECABC74 | <i>up</i>   | Alanine, fumaric acid, glutamic acid, isocitric acid, isomaltose, maltitol, saccharic acid, serine, threonine                                                                                                                    | Others                        | 30S ribosomal protein S31                                                      | AT2G38140   | <b>x</b>           |                          |
| Traes_7BS_3285CDC24 | <i>up</i>   | Fumaric acid, threonine                                                                                                                                                                                                          | Stress                        | F-box protein MAX2                                                             | AT2G42620   | <b>x</b>           |                          |

|                                            |             |                                                                                                                                                                                           |                                 |                                                                                      |           |          |          |
|--------------------------------------------|-------------|-------------------------------------------------------------------------------------------------------------------------------------------------------------------------------------------|---------------------------------|--------------------------------------------------------------------------------------|-----------|----------|----------|
| Traes_2BL_CCD296233                        | <i>down</i> | Emmer (Citric acid, glutamic acid, maltitol, valine)<br><br>Durum wheat (Aconitic acid, alanine, GABA, malic acid, maltose-turanose, myo-inositol, maltitol, quinic acid, ribose, valine) | Stress                          | Stress enhanced protein 2 (SEP2)                                                     | AT2G21970 | <b>x</b> | <b>x</b> |
| Traes_2AL_DB64E18A1                        | <i>down</i> | GABA, myo-inositol, maltitol, quinic acid, ribose, valine                                                                                                                                 | Purine metabolism               | Allantoinase (ALN) (EC 3.5.2.5)                                                      | AT4G04955 |          | <b>x</b> |
| Traes_7BS_7E9C070B8                        | <i>down</i> | Aconitic acid, alanine, b-alanine, citric acid, GABA, malic acid, maltose-turanose, myo-inositol, maltitol, quinic acid, shikimic acid, valine                                            | C metabolism (photorespiration) | Carboxyl-terminal-processing peptidase 3 (CTPA3) (EC 3.4.21.102)                     | AT3G57680 |          | <b>x</b> |
| Traes_1AL_928DC3A3C                        | <i>up</i>   | Aconitic acid, alanine, aspartic acid, citric acid, GABA, maltose-turanose, myo-inositol, maltitol, quinic acid, ribose, shikimic acid, valine                                            | Riboflavine metabolism          | Bifunctional riboflavin kinase/FMN phosphatase (FMN/FHY) (EC 3.1.3.102/ EC 2.7.1.26) | AT4G21470 |          | <b>x</b> |
| Traes_3AL_8C6F4F66A                        | <i>up</i>   | Aconitic acid, citric acid, GABA, maltose-turanose, myo-inositol, quinic acid, ribose, shikimic acid, valine                                                                              | Terpenoid backbone biosynthesis | 4-diphosphocytidyl-2-C-methyl-D-erythritol kinase (ISPE) (EC 2.7.1.148)              | AT2G26930 |          | <b>x</b> |
| Traes_3AS_922982272                        | <i>up</i>   | Alanine, b-alanine, fumaric acid                                                                                                                                                          | C metabolism (glycolysis)       | Probable zinc metalloprotease EGY2 (EC 3.4.24-)                                      | AT5G05740 |          | <b>x</b> |
| Traes_4AS_0B56CEBD5                        | <i>up</i>   | Aconitic acid, GABA, maltose-turanose, myo-inositol, quinic acid, ribose, shikimic acid, valine                                                                                           | stress                          | ATP-dependent Clp protease proteolytic subunit-related protein 3 (CLPR3)             | AT1G09130 |          | <b>x</b> |
| Traes_4BS_0ECAB85C2                        | <i>up</i>   | Aconitic acid, GABA, isocitric acid, maltose-turanose, myo-inositol, quinic acid, ribose, valine                                                                                          | others                          | 30S ribosomal protein S13                                                            | AT5G14320 |          | <b>x</b> |
| Traes_4AL_199EE1839<br>Traes_5BL_BD895CF84 | <i>up</i>   | Aconitic acid, alanine, citric acid, GABA, malic acid, maltose-turanose, myo-inositol, maltitol, quinic acid,                                                                             | Transcription factors           | DEAD-box ATP-dependent RNA helicase 3 (EC 3.6.4.13)                                  | AT5G26742 |          | <b>x</b> |

|                     |           |                                                                                                                                                                                             |                                      |                                                       |           |  |          |
|---------------------|-----------|---------------------------------------------------------------------------------------------------------------------------------------------------------------------------------------------|--------------------------------------|-------------------------------------------------------|-----------|--|----------|
|                     |           | ribose, shikimic acid, valine<br><br>Aconitic acid, alanine, b-alanine, citric acid, GABA, malic acid, maltose-turanose, myo-inositol, maltitol, quinic acid, ribose, shikimic acid, valine |                                      |                                                       |           |  |          |
| Traes_5BL_0684B3A02 | <i>up</i> | Aconitic acid, alanine, citric acid, GABA, maltose-turanose, myo-inositol, maltitol, quinic acid, ribose, shikimic acid, valine                                                             | Energy pathways                      | Cytochrome c biogenesis protein (CCS1)                | AT1G49380 |  | <b>x</b> |
| Traes_5BL_CFC7BB483 | <i>up</i> | Aconitic acid, alanine, citric acid, GABA, maltose-turanose, myo-inositol, maltitol, quinic acid, ribose, shikimic acid, valine                                                             | Porphyrin and chlorophyll metabolism | Magnesium-chelatase subunit ChlD (EC 6.6.1.1)         | AT1G08520 |  | <b>x</b> |
| Traes_6BL_34B508140 | <i>up</i> | Aconitic acid, alanine, GABA, malic acid, maltose-turanose, myo-inositol, maltitol, quinic acid, valine                                                                                     | others                               | Pentatricopeptide repeat-containing protein At4g39620 | AT4G39620 |  | <b>x</b> |
