# Supplementary material for: Comparative Analysis Based on Transcriptomics and Metabolomics Data Reveal Differences between Emmer and Durum Wheat in Response to Nitrogen Starvation
Source: MDPI journal article supplement (doi:10.3390/ijms22094790), 2021-04-30
Supplement: s1 [file s1]

**Table S5.** ANOVA for each individual metabolite, relating to their content in the leaves of emmer and durum wheat grown under starvation and optimal N conditions.

|                               | G   | N   | G x N |
|-------------------------------|-----|-----|-------|
| valine                        | ns  | ns  | ***   |
| glutamic acid                 | *** | *** | ***   |
| Alanine                       | ns  | ns  | ***   |
| β-alanine                     | ns  | ns  | ***   |
| Serine                        | ns  | ns  | **    |
| glycine                       | ns  | ns  | ns    |
| Threonine                     | ns  | ns  | *     |
| aspartic acid                 | **  | *   | ***   |
| asparagine                    | ns  | ns  | ns    |
| thryptophan                   | *   | ns  | ns    |
| GABA                          | ns  | ns  | **    |
| citric acid                   | **  | **  | **    |
| aconitic acid                 | **  | ns  | ***   |
| isocitric acid                | ns  | ns  | ns    |
| succinic acid                 | ns  | ns  | *     |
| fumaric acid                  | ns  | ns  | **    |
| malic acid                    | ns  | ns  | **    |
| shikimic acid                 | *   | ns  | **    |
| quinic acid                   | ns  | ns  | ***   |
| gluconic acid                 | ns  | ns  | ns    |
| saccharic acid                | **  | *   | **    |
| oxalic acid                   | ns  | ns  | ns    |
| phosphate                     | ns  | ns  | ns    |
| xylose - lyxose - threalose   | ns  | ns  | ns    |
| ribose                        | ns  | ns  | **    |
| Fructose                      | ns  | ns  | ns    |
| mannose - galactose - glucose | ns  | ns  | ns    |
| sucrose                       | ns  | ns  | ns    |
| isomaltose                    | ns  | ns  | *     |
| maltose - turanose            | ns  | ns  | **    |
| lactulose                     | ns  | ns  | ns    |
| maltitol                      | *** | *** | ***   |
| glycerol                      | ns  | ns  | ns    |
| mannitol                      | ns  | ns  | ns    |
| sorbitol                      | ns  | ns  | ns    |
| myo-inositol                  | ns  | ns  | **    |
| hexadecanoic acid             | ns  | ns  | ns    |
| 1-octacosanol                 | ns  | ns  | ns    |
| campsterol                    | ns  | ns  | ns    |
| stigmasterol                  | ns  | ns  | ns    |
| β-sitosterol                  | ns  | ns  | ns    |

n.s., not significant; \*,  $P \leq 0.05$ , \*\*,  $P \leq 0.01$ ; \*\*\*,  $P \leq 0.001$
