# Supplementary material for: Comparative Analysis Based on Transcriptomics and Metabolomics Data Reveal Differences between Emmer and Durum Wheat in Response to Nitrogen Starvation
Source: MDPI journal article supplement (doi:10.3390/ijms22094790), 2021-04-30
Supplement: s1 [file s1]

**Table S4.** Most significant GO categories in emmer (Molise Sel. Colli) and durum wheat (Simeto)

|                                 | categories                                    | GO Terms                                                                           | p_value<br>emmer | Number of<br>DEGs per GO<br>emmer | p_value<br>durum wheat | Number of<br>DEGs per GO<br>durum wheat |
|---------------------------------|-----------------------------------------------|------------------------------------------------------------------------------------|------------------|-----------------------------------|------------------------|-----------------------------------------|
| Biological Process up-regulated | cellular component organization or biogenesis | plastid organization                                                               |                  |                                   | 1,21E-14               | 67                                      |
|                                 |                                               | chloroplast organization                                                           |                  |                                   | 3,16E-10               | 50                                      |
|                                 | cellular process                              | translation                                                                        | 1,40E-47         | 181                               | 1,12E-82               | 273                                     |
|                                 |                                               | peptide biosynthetic process                                                       | 2,50E-46         | 181                               | 1,61E-81               | 274                                     |
|                                 |                                               | amide biosynthetic process                                                         | 1,08E-45         | 185                               | 2,08E-82               | 283                                     |
|                                 |                                               | peptide metabolic process                                                          | 1,81E-45         | 182                               | 1,80E-79               | 275                                     |
|                                 |                                               | cellular amide metabolic process                                                   | 8,71E-43         | 186                               | 2,98E-77               | 284                                     |
|                                 |                                               | cellular nitrogen compound biosynthetic process                                    | 8,64E-18         | 283                               | 1,25E-29               | 417                                     |
|                                 |                                               | cellular biosynthetic process                                                      | 4,41E-16         | 366                               | 4,15E-25               | 535                                     |
|                                 |                                               | cellular nitrogen compound metabolic process                                       | 6,07E-11         | 367                               | 3,48E-19               | 540                                     |
|                                 |                                               | carboxylic acid metabolic process                                                  | 1,45E-05         | 148                               | 2,21E-07               | 203                                     |
|                                 |                                               | plastid organization                                                               |                  |                                   | 1,21E-14               | 67                                      |
|                                 |                                               | chloroplast organization                                                           |                  |                                   | 3,16E-10               | 50                                      |
|                                 |                                               | ncRNA metabolic process                                                            |                  |                                   | 2,05E-08               | 102                                     |
|                                 |                                               | cellular amino acid metabolic process                                              |                  |                                   | 2,34E-08               | 134                                     |
|                                 |                                               | oxoacid metabolic process                                                          |                  |                                   | 1,24E-06               | 204                                     |
|                                 |                                               | organic acid metabolic process                                                     |                  |                                   | 1,61E-06               | 204                                     |
|                                 |                                               | tetrapyrrole biosynthetic process                                                  |                  |                                   | 5,50E-06               | 39                                      |
|                                 |                                               | isopentenyl diphosphate metabolic process                                          |                  |                                   | 9,20E-06               | 40                                      |
|                                 |                                               | isopentenyl diphosphate biosynthetic process                                       |                  |                                   | 9,20E-06               | 40                                      |
|                                 |                                               | cellular macromolecule biosynthetic process                                        |                  |                                   | 1,49E-05               | 349                                     |
|                                 |                                               | isopentenyl diphosphate biosynthetic process, methylerythritol 4-phosphate pathway |                  |                                   | 1,55E-05               | 39                                      |
|                                 | metabolic process                             | organonitrogen compound biosynthetic process                                       | 2,07E-68         | 286                               | 2,82E-100              | 412                                     |
|                                 |                                               | organonitrogen compound metabolic process                                          | 3,33E-49         | 310                               | 2,21E-78               | 459                                     |
|                                 |                                               | translation                                                                        | 1,40E-47         | 181                               | 1,12E-82               | 273                                     |
|                                 |                                               | peptide biosynthetic process                                                       | 2,50E-46         | 181                               | 1,61E-81               | 274                                     |
|                                 |                                               | amide biosynthetic process                                                         | 1,08E-45         | 185                               | 2,08E-82               | 283                                     |

|                                 |                    |                                                                                    |          |     |          |     |
|---------------------------------|--------------------|------------------------------------------------------------------------------------|----------|-----|----------|-----|
|                                 |                    | peptide metabolic process                                                          | 1,81E-45 | 182 | 1,80E-79 | 275 |
|                                 |                    | cellular amide metabolic process                                                   | 8,71E-43 | 186 | 2,98E-77 | 284 |
|                                 |                    | cellular nitrogen compound biosynthetic process                                    | 8,64E-18 | 283 | 1,25E-29 | 417 |
|                                 |                    | organic substance biosynthetic process                                             | 8,30E-17 | 372 | 1,24E-21 | 532 |
|                                 |                    | cellular biosynthetic process                                                      | 1,41E-16 | 366 | 4,15E-25 | 535 |
|                                 |                    | biosynthetic process                                                               | 2,21E-14 | 381 | 2,72E-20 | 552 |
|                                 |                    | nitrogen compound metabolic process                                                | 4,72E-13 | 399 | 6,40E-22 | 591 |
|                                 |                    | cellular nitrogen compound metabolic process                                       | 6,07E-11 | 367 | 3,48E-19 | 540 |
|                                 |                    | carboxylic acid metabolic process                                                  | 1,45E-05 | 148 | 2,21E-07 | 203 |
|                                 |                    | gene expression                                                                    |          |     | 2,00E-11 | 385 |
|                                 |                    | ncRNA metabolic process                                                            |          |     | 2,05E-08 | 102 |
|                                 |                    | cellular amino acid metabolic process                                              |          |     | 2,34E-08 | 134 |
|                                 |                    | oxoacid metabolic process                                                          |          |     | 1,24E-06 | 204 |
|                                 |                    | organic acid metabolic process                                                     |          |     | 1,61E-06 | 204 |
|                                 |                    | tetrapyrrole biosynthetic process                                                  |          |     | 5,50E-06 | 39  |
|                                 |                    | isopentenyl diphosphate biosynthetic process                                       |          |     | 9,20E-06 | 40  |
|                                 |                    | isopentenyl diphosphate metabolic process                                          |          |     | 9,20E-06 | 40  |
|                                 |                    | cellular macromolecule biosynthetic process                                        |          |     | 1,49E-05 | 349 |
|                                 |                    | isopentenyl diphosphate biosynthetic process, methylerythritol 4-phosphate pathway |          |     | 1,55E-05 | 39  |
|                                 |                    | macromolecule biosynthetic process                                                 |          |     | 6,97E-05 | 351 |
| Molecular Function up-regulated | binding            | binding                                                                            | 1,68E-39 | 507 | 0        | 736 |
|                                 |                    | RNA binding                                                                        | 2,22E-19 | 92  | 7,35E-44 | 127 |
|                                 |                    | heterocyclic compound binding                                                      | 4,44E-17 | 330 | 5,31E-80 | 469 |
|                                 |                    | organic cyclic compound binding                                                    | 4,44E-17 | 330 | 5,31E-80 | 469 |
|                                 |                    | nucleic acid binding                                                               | 4,19E-07 | 163 | 1,19E-29 | 222 |
|                                 |                    | ion binding                                                                        |          |     | 9,23E-46 | 404 |
|                                 |                    | small molecule binding                                                             |          |     | 8,90E-21 | 279 |
|                                 |                    | nucleoside phosphate binding                                                       |          |     | 3,66E-16 | 267 |
|                                 |                    | nucleotide binding                                                                 |          |     | 3,66E-16 | 267 |
|                                 |                    | anion binding                                                                      |          |     | 2,81E-14 | 249 |
|                                 |                    | purine ribonucleoside triphosphate binding                                         |          |     | 6,14E-05 | 196 |
|                                 | catalytic activity | catalytic activity                                                                 | 4,90E-94 | 518 | 0        | 740 |

|                                   |                              |                                                               |          |     |           |     |
|-----------------------------------|------------------------------|---------------------------------------------------------------|----------|-----|-----------|-----|
|                                   |                              | hydrolase activity                                            | 5,99E-09 | 182 | 1,27E-26  | 234 |
|                                   |                              | oxidoreductase activity                                       |          |     | 1,27E-26  | 159 |
|                                   |                              | ligase activity                                               |          |     | 5,35E-16  | 75  |
|                                   |                              | ligase activity, forming aminoacyl-tRNA and related compounds |          |     | 6,69E-14  | 41  |
|                                   |                              | ligase activity, forming carbon-oxygen bonds                  |          |     | 6,69E-14  | 41  |
|                                   |                              | hydrolase activity, acting on glycosyl bonds                  |          |     | 1,47E-13  | 64  |
|                                   |                              | aminoacyl-tRNA ligase activity                                |          |     | 3,00E-13  | 41  |
|                                   |                              | hydrolase activity, hydrolyzing O-glycosyl compounds          |          |     | 8,83E-12  | 60  |
|                                   |                              | lyase activity                                                |          |     | 6,98E-10  | 57  |
|                                   |                              | transferase activity, transferring one-carbon groups          |          |     | 7,72E-05  | 51  |
|                                   | structural molecule activity | structural constituent of ribosome                            | 1,16E-92 | 141 | 1,12E-160 | 196 |
|                                   |                              | structural molecule activity                                  | 7,74E-84 | 146 | 6,84E-141 | 198 |
| Molecular Function down-regulated | binding                      | binding                                                       |          |     | 0         | 556 |
|                                   |                              | heterocyclic compound binding                                 |          |     | 3,70E-90  | 390 |
|                                   |                              | organic cyclic compound binding                               |          |     | 3,70E-90  | 390 |
|                                   |                              | ion binding                                                   |          |     | 1,92E-74  | 363 |
|                                   |                              | anion binding                                                 |          |     | 9,34E-50  | 261 |
|                                   |                              | adenyl ribonucleotide binding                                 |          |     | 5,67E-45  | 226 |
|                                   |                              | adenyl nucleotide binding                                     |          |     | 6,05E-45  | 228 |
|                                   |                              | carbohydrate derivative binding                               |          |     | 5,22E-42  | 238 |
|                                   |                              | ribonucleotide binding                                        |          |     | 4,16E-41  | 234 |
|                                   |                              | ATP binding                                                   |          |     | 1,05E-40  | 209 |
|                                   |                              | ribonucleoside binding                                        |          |     | 1,41E-39  | 232 |
|                                   |                              | nucleoside binding                                            |          |     | 1,45E-39  | 232 |
|                                   |                              | purine nucleoside binding                                     |          |     | 2,18E-39  | 231 |
|                                   |                              | purine ribonucleoside binding                                 |          |     | 2,18E-39  | 231 |
|                                   |                              | purine ribonucleotide binding                                 |          |     | 2,18E-39  | 231 |
|                                   |                              | purine nucleotide binding                                     |          |     | 2,47E-39  | 233 |
|                                   |                              | nucleoside phosphate binding                                  |          |     | 7,26E-37  | 252 |
|                                   |                              | nucleotide binding                                            |          |     | 7,26E-37  | 252 |
|                                   |                              | small molecule binding                                        |          |     | 2,61E-36  | 254 |
|                                   |                              | purine ribonucleoside triphosphate binding                    |          |     | 5,09E-35  | 214 |

|                      |                                                                 |  |  |          |     |
|----------------------|-----------------------------------------------------------------|--|--|----------|-----|
| catalytic activity   | catalytic activity                                              |  |  | 0        | 566 |
|                      | transferase activity                                            |  |  | 1,23E-36 | 228 |
|                      | transferase activity, transferring phosphorus-containing groups |  |  | 2,45E-28 | 160 |
|                      | kinase activity                                                 |  |  | 3,96E-25 | 140 |
|                      | phosphotransferase activity, alcohol group as acceptor          |  |  | 1,49E-22 | 134 |
|                      | protein kinase activity                                         |  |  | 1,98E-21 | 122 |
|                      | hydrolase activity                                              |  |  | 2,00E-16 | 174 |
|                      | protein serine/threonine kinase activity                        |  |  | 1,06E-05 | 58  |
| transporter activity | transporter activity                                            |  |  | 3,12E-36 | 120 |
|                      | transmembrane transporter activity                              |  |  | 1,93E-19 | 84  |
|                      | substrate-specific transporter activity                         |  |  | 2,79E-06 | 60  |
|                      | active transmembrane transporter activity                       |  |  | 9,09E-05 | 42  |
