# Supplementary material for: Comparative Analysis Based on Transcriptomics and Metabolomics Data Reveal Differences between Emmer and Durum Wheat in Response to Nitrogen Starvation
Source: MDPI journal article supplement (doi:10.3390/ijms22094790), 2021-04-30
Supplement: s1 [file s1]

**Table S6.** Number of edges between central DEGs genes and significantly behaved metabolites under the two N conditions. For each metabolite was highlight in bold the higher number of edges.

| From | To               | wheat                | Total edge between DEGs and significantly behaved metabolites | Total edge between central DEGs and significantly behaved metabolites |
|------|------------------|----------------------|---------------------------------------------------------------|-----------------------------------------------------------------------|
| DEGs | Aconitic acid    | emmer<br>durum wheat | 383<br>1867                                                   | 71<br><b>344</b>                                                      |
| DEGs | Alanine          | emmer<br>durum wheat | 705<br>1430                                                   | 88<br><b>320</b>                                                      |
| DEGs | aspartic acid    | emmer<br>durum wheat | 899<br>497                                                    | 143<br>119                                                            |
| DEGs | $\beta$ -alanine | emmer<br>durum wheat | 37<br>687                                                     | 10<br><b>179</b>                                                      |
| DEGs | citric acid      | emmer<br>durum wheat | 700<br>464                                                    | 130<br>124                                                            |
| DEGs | fumaric acid     | emmer<br>durum wheat | 527<br>548                                                    | 89<br>121                                                             |
| DEGs | GABA             | emmer<br>durum wheat | 12<br>2954                                                    | 1<br><b>479</b>                                                       |
| DEGs | glutamic acid    | emmer<br>durum wheat | 1360<br>101                                                   | <b>201</b><br>19                                                      |
| DEGs | isocitric acid   | emmer<br>durum wheat | 44<br>53                                                      | <b>21</b><br>7                                                        |
| DEGs | Isomaltose       | emmer<br>durum wheat | 338<br>28                                                     | <b>55</b><br>0                                                        |
| DEGs | malic acid       | emmer<br>durum wheat | 213<br>851                                                    | 54<br><b>199</b>                                                      |
| DEGs | maltose-turanose | emmer<br>durum wheat | 254<br>1796                                                   | 36<br><b>299</b>                                                      |
| DEGs | myo-inositol     | emmer<br>durum wheat | 36<br>2725                                                    | 5<br><b>460</b>                                                       |
| DEGs | maltitol         | emmer<br>durum wheat | 1667<br>1977                                                  | 431<br>391                                                            |
| DEGs | quinic acid      | emmer<br>durum wheat | 244<br>2873                                                   | 60<br><b>474</b>                                                      |
| DEGs | Ribose           | emmer<br>durum wheat | 131<br>1906                                                   | 36<br><b>355</b>                                                      |
| DEGs | saccharic acid   | emmer<br>durum wheat | 52<br>59                                                      | <b>23</b><br>2                                                        |
| DEGs | Serine           | emmer<br>durum wheat | 486<br>36                                                     | <b>77</b><br>1                                                        |
| DEGs | shikimic acid    | emmer<br>durum wheat | 244<br>1564                                                   | 52<br><b>270</b>                                                      |
| DEGs | succinic acid    | emmer<br>durum wheat | 218<br>52                                                     | <b>47</b><br>0                                                        |
| DEGs | Threonine        | emmer<br>durum wheat | 266<br>50                                                     | <b>50</b><br>0                                                        |
| DEGs | Valine           | emmer<br>durum wheat | 1390<br>2484                                                  | 218<br><b>427</b>                                                     |
