# Supplementary material for: Comparative Analysis Based on Transcriptomics and Metabolomics Data Reveal Differences between Emmer and Durum Wheat in Response to Nitrogen Starvation
Source: MDPI journal article supplement (doi:10.3390/ijms22094790), 2021-04-30

**Figure S1.** Position of down- (red) and up-regulated (blue) DEGs in emmer (Molise Sel. Colli) and durum wheat (Simeto) on the physical map. Central DEGs in the transcript-metabolite correlation networks were shown by triangles.

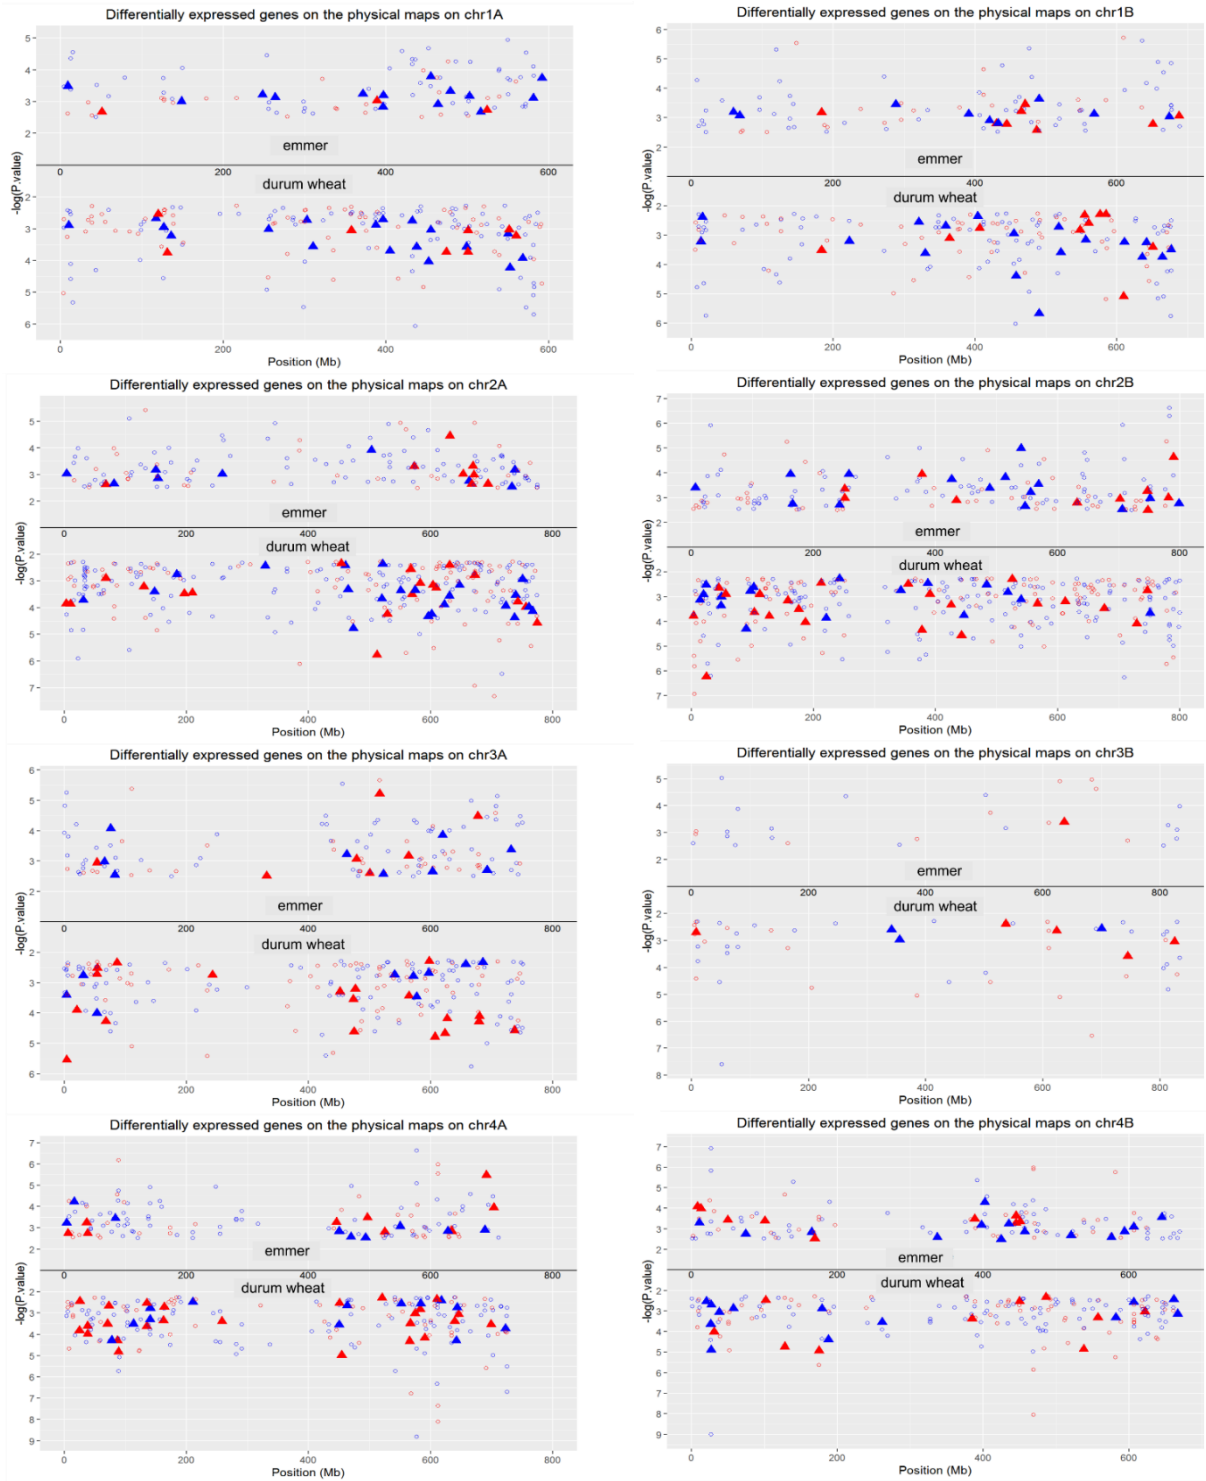

**Figure S1 (continued).** Position of down- (red) and up-regulated (blue) DEGs in emmer (Molise Sel. Colli) and durum wheat (Simeto) on the physical map. Central DEGs in the transcript-metabolite correlation networks were shown by triangles.

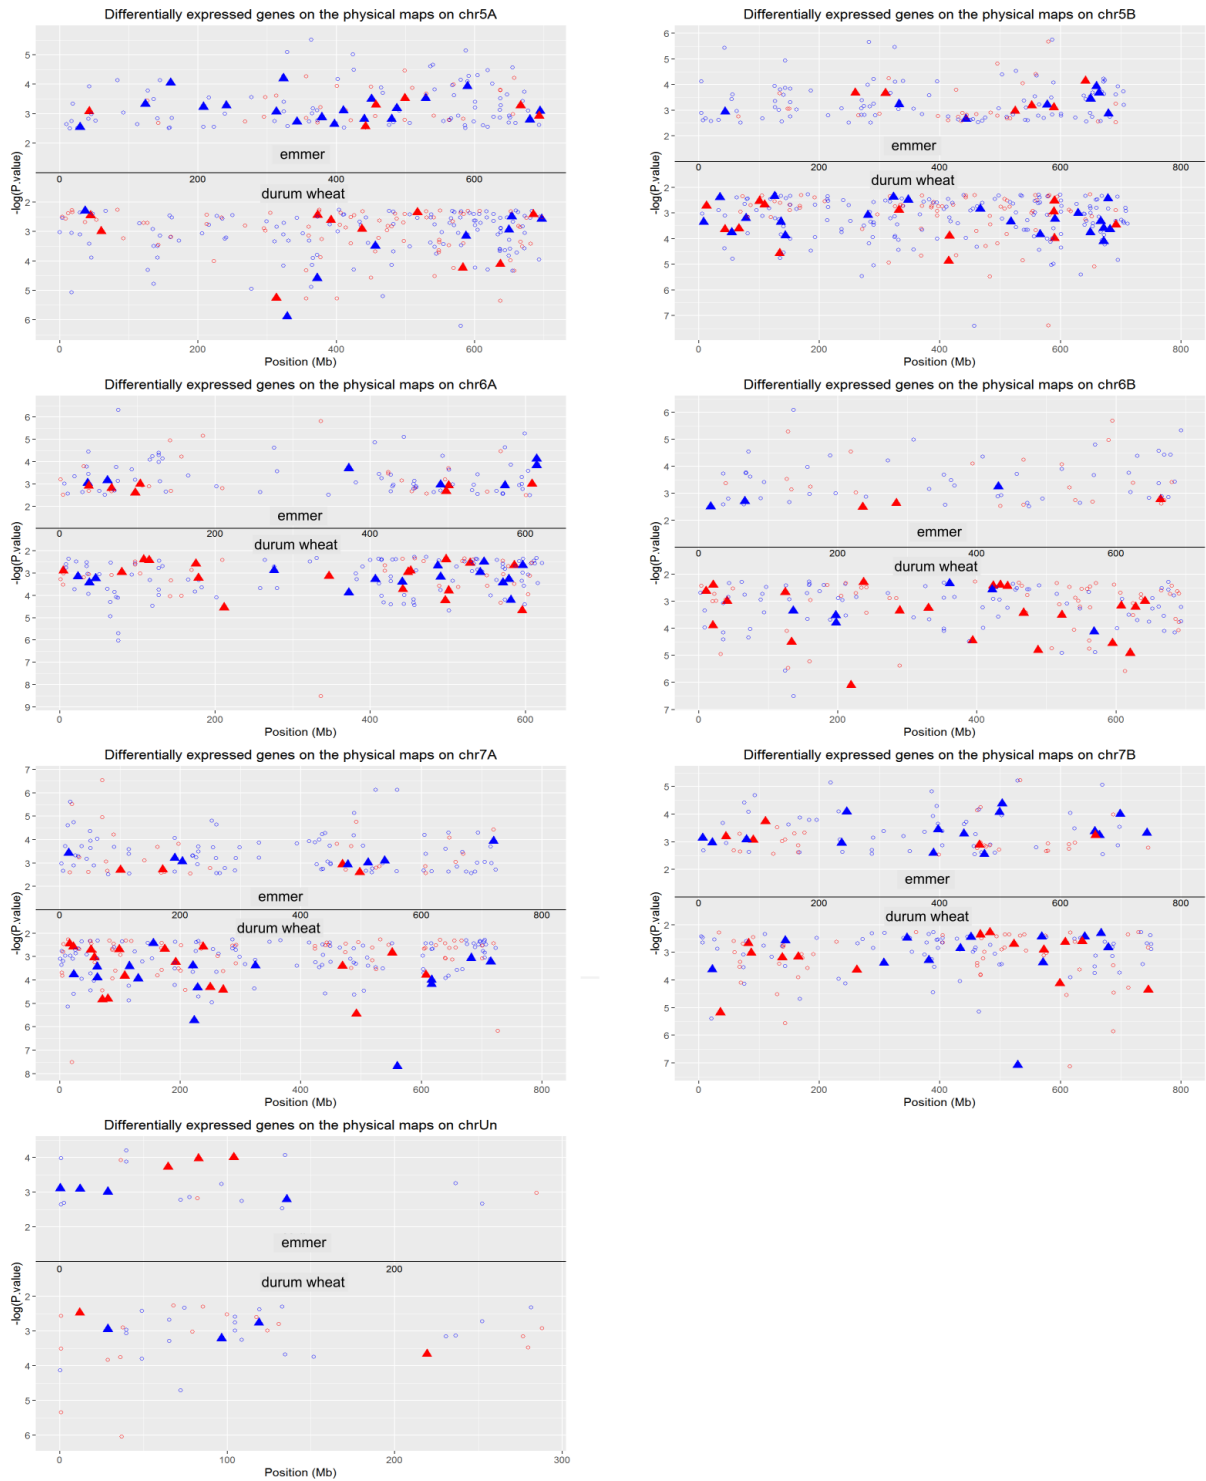

Supplement: s1 [file s1]
