# Supplementary material for: Comparative Analysis Based on Transcriptomics and Metabolomics Data Reveal Differences between Emmer and Durum Wheat in Response to Nitrogen Starvation
Source: MDPI journal article supplement (doi:10.3390/ijms22094790), 2021-04-30
Supplement: s1 [file s1]

**Table S8.** Putative function of DEGs specific to each of the tetraploid wheats with central roles in either of emmer-specific and durum wheat-specific networks.

| DEGs                 | up/down | metabolites                                                                                 | group               | Putative function description                                          | Orthologues | Central role emmer | Central role durum wheat |
|----------------------|---------|---------------------------------------------------------------------------------------------|---------------------|------------------------------------------------------------------------|-------------|--------------------|--------------------------|
| Traes_1AL_5F0F4FAFB  | down    | aspartic acid, citric acid<br>glutamic acid, maltitol<br>valine                             | kinases             | Non-specific serine/threonine protein kinase (EC 2.7.11.1)             |             | x                  |                          |
| Traes_3AL_883A4805C  | down    | aconitic acid, aspartic acid, citric acid,<br>fumaric acid, glutamic acid, maltitol, valine | other C metabolisms | Cytokinin riboside 5'-monophosphate phosphoribohydrolase (EC 3.2.2.n1) | AT2G37210   | x                  |                          |
| Traes_4BL_4D370C9FA  | down    | Alanine, fumaric acid<br>glutamic acid,<br>maltitol, threonine                              | stress              | Probable mediator of RNA polymerase II transcription subunit 37c       | AT3G12580   | x                  |                          |
| Traes_4BL_4D370C9FA1 |         | Alanine, fumaric acid<br>glutamic acid,<br>isomaltose, maltitol<br>serine, valine           |                     |                                                                        |             |                    |                          |
| Traes_4BL_96C906D61  | down    | citric acid, glutamic acid<br>maltitol, valine                                              | stress              | Non-specific lipid-transfer protein                                    | AT3G08770   | x                  |                          |
| Traes_5AL_6FB526190  | down    | citric acid, glutamic acid<br>maltitol, valine                                              | N metabolism        | Carbonic anhydrase (EC 4.2.1.1)                                        | AT5G14740   | x                  |                          |
| Traes_5BL_A0ED5623C  | down    | Maltitol, valine                                                                            | stress              | Phospholipase D delta (PLDDELTA) (EC3.1.4.4)                           | AT4G35790   | x                  |                          |
| Traes_7AS_9A01E6B17  | down    | aconitic acid, aspartic acid, citric acid,<br>glutamic acid, maltitol<br>valine             | transporter         | Potassium transporter                                                  | AT2G30070   | x                  |                          |
| Traes_7BL_8930CD1E5  | down    | aspartic acid, citric acid<br>glutamic acid,<br>palatinose -maltitol,<br>valine             | Stress              | Peptide methionine sulfoxide reductase B1, chloroplastic (EC 1.8.4.12) | AT1G53670   | x                  |                          |
| Traes_1AL_4B7636BC9  | up      | Valine, maltitol                                                                            | Stress              | Protein LOL1                                                           | AT1G32540   | x                  |                          |
| Traes_1AL_090571678  | up      | Alanine, aspartic acid<br>fumaric acid, glutamic                                            | transporter         | Secretory carrier-associated membrane protein (SCAMP)                  | AT1G61250   | x                  |                          |

|                     |    |                                                                                                                                                                                                            |                        |                                                             |           |   |
|---------------------|----|------------------------------------------------------------------------------------------------------------------------------------------------------------------------------------------------------------|------------------------|-------------------------------------------------------------|-----------|---|
|                     |    | acid, isomaltose,<br>malic acid, maltose-<br>turanose, maltitol<br>quinic acid, ribose,<br>serine, shikimic acid,<br>valine                                                                                |                        |                                                             |           |   |
| Traes_1BL_5F74C58ED |    | alanine, glutamic acid,<br>maltose-turanose,<br>maltitol                                                                                                                                                   |                        |                                                             |           |   |
| Traes_1AL_1538AC680 | up | alanine, citric acid,<br>glutamic acid,<br>maltose-turanose,<br>maltitol, valine                                                                                                                           | Kinases                | Nucleoside diphosphate kinase<br>(EC 2.7.4.6)               | AT4G23895 | x |
| Traes_1BL_ACC9DDA86 |    | citric acid, glutamic<br>acid<br>maltitol, valine                                                                                                                                                          |                        |                                                             |           |   |
| Traes_1AL_8E8E7401B | up | alanine, maltose-<br>turanose, maltitol,<br>serine, valine                                                                                                                                                 | other C<br>metabolisms | Beta-hexosaminidase (EC<br>3.2.1.52)                        | AT3G49850 | x |
| Traes_1BL_7F9006C51 | up | glutamic acid,<br>maltitol, valine                                                                                                                                                                         | Stress                 | Hyperosmolality-gated Ca <sup>2+</sup><br>permeable channel |           | x |
| Traes_1BL_C706FAA2B | up | glutamic acid<br>maltitol, valine                                                                                                                                                                          | Others                 | Ribosomal protein L17                                       | AT3G54210 | x |
| Traes_2AL_5BAB26827 | up | citric acid, maltitol,<br>valine                                                                                                                                                                           | Stress                 | Lipoxygenase (EC 1.13.11-)                                  | AT3G45140 | x |
| Traes_2AS_34272605C | up | alanine, aspartic acid,<br>fumaric acid, glutamic<br>acid, isocitric acid<br>isomaltose, maltitol,<br>quinic acid, ribose,<br>saccharic acid, serine<br>shikimic acid, succinic<br>acid, threonine, valine | Stress                 | Tubulin alpha chain                                         | AT4G14960 | x |
| Traes_2AS_7D3EC9FC2 | up | citric acid, glutamic<br>acid<br>maltitol, valine                                                                                                                                                          | Others                 | E3 ubiquitin-protein ligase                                 |           | x |
| Traes_3AS_CD8EF3E96 | up | citric acid, glutamic<br>acid<br>maltitol, valine                                                                                                                                                          | Others                 | FRIGIDA-like protein                                        | AT5G16320 | x |
| Traes_4AL_17C4B47B3 | up | aconitic acid, aspartic<br>acid, glutamic acid,                                                                                                                                                            | Others                 | Pentatricopeptide repeat-<br>containing protein At4g31850,  | AT4G31850 | x |

|                     |             | maltitol                                                                                                                                                       |                           | chloroplastic                                                               |                 |          |
|---------------------|-------------|----------------------------------------------------------------------------------------------------------------------------------------------------------------|---------------------------|-----------------------------------------------------------------------------|-----------------|----------|
| Traes_4AS_4C25DF6F4 | <i>up</i>   | aspartic acid, citric acid, glutamic acid, maltitol valine                                                                                                     | others C metabolism       | Beta-galactosidase (EC 3.2.1.23)                                            | AT2G32810       | <b>x</b> |
| Traes_5AL_CEEDF43FC | <i>up</i>   | alanine, aspartic acid, isomaltose, maltose-turanose, maltitol, ribose, serine, valine                                                                         | Fatty acid metabolism     | Acyl-[acyl-carrier-protein] hydrolase (EC 3.1.2.-)                          | AXX17-AT1G08340 | <b>x</b> |
| Traes_6AL_006779D22 | <i>up</i>   | aconitic acid, alanine, aspartic acid, citric acid, fumaric acid, glutamic acid, malic acid, maltitol, quinic acid, serine, valine                             | other C metabolisms       | Xyloglucan endotransglucosylase/hydrolase (EC 2.4.1.207)                    | AT2G06850       | <b>x</b> |
| Traes_6BS_C9B216D97 | <i>up</i>   | alanine, aspartic acid, citric acid, glutamic acid, malic acid, maltitol, quinic acid, valine                                                                  | C metabolism (glycolysis) | Acetyltransferase component of pyruvate dehydrogenase complex (EC 2.3.1.12) | AXX17-AT1G48680 | <b>x</b> |
| Traes_7AS_378A12AA9 | <i>up</i>   | aconitic acid, aspartic acid, citric acid, fumaric acid, glutamic acid, maltitol, quinic acid, shikimic acid, valine                                           | Others                    | TGW-7A                                                                      |                 | <b>x</b> |
| Traes_7AS_A80BE362A | <i>up</i>   | aconitic acid, aspartic acid, citric acid, glutamic acid, maltitol valine                                                                                      | others C metabolism       | Sucrose synthase (EC 2.4.1.13)                                              | AT5G49190       | <b>x</b> |
| Traes_7BL_E2E7AA383 | <i>up</i>   | alanine, aspartic acid, fumaric acid, isocitric acid, isomaltose, myo-inositol, maltitol, quinic acid, ribose, serine, shikimic acid, succinic acid, threonine | Stress                    | Protein Overexpressor of Cationic Peroxidase 3                              | AT5G11270       | <b>x</b> |
| Traes_1AL_A970EBB27 | <i>down</i> | aconitic acid, alanine,                                                                                                                                        | Stress                    | Protein Detoxification 42                                                   | AT1G51340       | <b>x</b> |

|                     |      |                                                                                                                                                            |                       |                                                |           |  |   |
|---------------------|------|------------------------------------------------------------------------------------------------------------------------------------------------------------|-----------------------|------------------------------------------------|-----------|--|---|
|                     |      | b-alanine, fumaric acid, GABA, malic acid, maltose-turanose, myo-inositol, maltitol, quinic acid, ribose, valine                                           |                       |                                                |           |  |   |
| Traes_1AS_AEEC8D740 | down | alanine, b-alanine, GABA, maltose-turanose, myo-inositol, maltitol, quinic acid, valine                                                                    | Others                | E3 ubiquitin-protein ligase UPL6 (EC 2.3.2.26) | AT3G17205 |  | x |
| Traes_1BL_9772C6F45 | down | alanine, aspartic acid beta-alanine, fumaric acid, GABA, malic acid, myo-inositol, maltitol, quinic acid, ribose, shikimic acid, valine                    | transporter           | Calcium-transporting ATPase (EC 3.6.3.8)       | AT1G27770 |  | x |
| Traes_1BL_A9AC1340E | down | aconitic acid, alanine, GABA, malic acid, maltose-turanose, myo-inositol, maltitol, quinic acid, ribose, valine                                            | Transcription factors | Auxin response factor (ARF family)             | AT5G20730 |  | x |
| Traes_1BS_4A63D1DBC | down | GABA, quinic acid, ribose, shikimic acid, valine                                                                                                           | other C metabolisms   | Phosphatidate cytidyltransferase (EC 2.7.7.41) | AT4G22340 |  | x |
| Traes_2AL_BDC8DD6C7 | down | aconitic acid, alanine, aspartic acid, beta-alanine, fumaric acid, GABA, malic acid, maltose-turanose, myo-inositol, maltitol, quinic acid, ribose, valine | kinases               | Serine/threonine-protein kinase (EC 2.7.11.1)  |           |  | x |
| Traes_2AL_E80950527 | down | alanine, GABA, maltose-turanose, myo-inositol, maltitol, quinic acid, valine                                                                               | transporter           | Chloride channel protein                       | AT5G40890 |  | x |
| Traes_2AL_EC2CE85AC | down | GABA, myo-inositol,                                                                                                                                        | others                | RING-type E3 ubiquitin                         | ATG23140  |  | x |

|                     |      |                                                                                                                                                                 |                                      |                                                                            |           |   |
|---------------------|------|-----------------------------------------------------------------------------------------------------------------------------------------------------------------|--------------------------------------|----------------------------------------------------------------------------|-----------|---|
|                     |      | quinic acid, ribose                                                                                                                                             |                                      | transferase (EC 2.3.2.27)                                                  |           |   |
| Traes_2AL_F4F6F518D | down | alanine, GABA, myo-<br>inositol, quinic acid,<br>ribose, maltitol                                                                                               | stress                               | Amine oxidase (EC 1.4.3.-)                                                 | AT4G12290 | x |
| Traes_2BL_19B3E60AA | down | aconitic acid, alanine,<br>citric acid, GABA,<br>malic acid, maltose-<br>turanose, myo-<br>inositol, maltitol,<br>quinic acid, ribose,<br>shikimic acid, valine | transporter                          | Probable copper-transporting<br>ATPase HMA5 (EC 3.6.3.54)                  | AT1G63440 | x |
| Traes_2BL_BB2C0F695 | down | aconitic acid, alanine,<br>beta-alanine, GABA<br>myo-inositol, maltitol,<br>quinic acid, ribose                                                                 | others                               | Histone H3                                                                 | AT5G65350 | x |
| Traes_3AL_FFE4C92D8 | down | aconitic acid, alanine,<br>citric acid, GABA,<br>malic acid, maltose-<br>turanose, myo-<br>inositol, maltitol,<br>quinic acid, shikimic<br>acid, valine         | others C<br>metabolism               | Cellulose synthase A catalytic<br>subunit 8 [UDP-forming] (EC<br>2.4.1.12) | AT4G18780 | x |
| Traes_4AL_D7702A458 | down | aconitic acid, beta-<br>alanine, fumaric acid,<br>GABA, myo-inositol,<br>maltitol, quinic acid,<br>ribose, shikimic acid,<br>valine                             | transporter                          | Plasma membrane ATPase (EC<br>3.6.3.6)                                     | AT2G18960 | x |
| Traes_5AL_07C125B1C | down | alanine, beta-alanine,<br>GABA, quinic acid,<br>maltose-turanose,<br>valine myo-inositol,<br>shikimic acid, maltitol                                            | stress                               | Hypersensitive induced reaction<br>protein 2                               | AT1G69840 | x |
| Traes_5AL_13E2DEC48 | down | aconitic acid, GABA<br>myo-inositol, valine,<br>maltitol, quinic acid,<br>ribose                                                                                | Transcription<br>factors             | MIKC-type MADS-box<br>transcription factor WM6                             |           | x |
| Traes_5AL_23B24917C | down | aconitic acid, alanine,<br>beta-alanine, citric<br>acid<br>GABA, malic acid,                                                                                    | C metabolism<br>(photosynthes<br>is) | Ferrochelatase (EC 4.99.1.1)                                               | AT2G30390 | x |

|                     |      |                                                                                                                                                                               |                                     |                                                                             |           |   |
|---------------------|------|-------------------------------------------------------------------------------------------------------------------------------------------------------------------------------|-------------------------------------|-----------------------------------------------------------------------------|-----------|---|
|                     |      | maltose-turanose,<br>valine<br>myo-inositol, shikimic<br>acid, maltitol, quinic<br>acid, ribose                                                                               |                                     |                                                                             |           |   |
| Traes_5BL_FF9AA4B58 |      | aconitic acid, alanine,<br>citric acid, GABA,<br>maltose-turanose,<br>myo-inositol, maltitol,<br>quinic acid, ribose,<br>shikimic acid, valine                                |                                     |                                                                             |           |   |
| Traes_5AS_BA57B5B56 | down | aconitic acid, GABA,<br>myo-inositol, valine<br>maltitol, quinic acid,<br>ribose                                                                                              | Purine/pyrimi<br>dine<br>metabolism | Ureidoglycolate hydrolase<br>(allantoate amido hydrolase) (EC<br>3.5.1.116) | AT5G43600 | x |
| Traes_5BL_369BF7271 | down | GABA, myo-inositol,<br>maltitol, quinic acid                                                                                                                                  | others                              | Thioredoxin-like protein<br>HCF164                                          | AT4G37200 | x |
| Traes_5BL_E123D8905 | down | aconitic acid, alanine,<br>citric acid, GABA,<br>malic acid, maltose-<br>turanose, myo-<br>inositol, maltitol,<br>quinic acid, ribose,<br>valine                              | others                              | ALBINO3-like protein 1,<br>chloroplastic                                    | AT1G24490 | x |
| Traes_6AS_0C1D497EA | down | aconitic acid, alanine,<br>b-alanine, citric acid,<br>GABA, malic acid,<br>valine, maltose-<br>turanose, myo-<br>inositol, maltitol,<br>quinic acid, ribose,<br>shikimic acid | Amino acid<br>metabolism            | S-adenosylmethionine synthase 4<br>(EC 2.5.1.6)                             | AT3G17390 | x |
| Traes_6AS_F3CC61A36 | down | GABA, quinic acid,<br>shikimic acid, valine                                                                                                                                   | other C<br>metabolisms              | Terpene cyclase/mutase family<br>member (EC5.4.99-)                         | AT1G78950 | x |
| Traes_6BL_2B67C5E30 | down | aconitic acid, GABA,<br>maltose-turanose,<br>myo-inositol, quinic<br>acid, valine                                                                                             | transporter                         | Glycolipid transfer protein 1<br>(GLTP 1)                                   | AT2G33470 | x |
| Traes_6BS_A80520954 | down | aconitic acid, alanine,<br>aspartic acid, b-<br>alanine, citric acid,                                                                                                         | other C<br>metabolisms              | Phosphopantetheine-<br>adenylyltransferase (PPAT) (EC<br>2.7.7.3)           | AT2G18250 | x |

|                     |      |                                                                                                                                                    |                               |                                                               |           |   |
|---------------------|------|----------------------------------------------------------------------------------------------------------------------------------------------------|-------------------------------|---------------------------------------------------------------|-----------|---|
|                     |      | fumaric acid, GABA, malic acid, maltose-turanose, myo-inositol, maltitol, quinic acid, ribose, shikimic acid, valine                               |                               |                                                               |           |   |
| Traes_7AS_E477E850F | down | aconitic acid, alanine, aspartic acid, beta-alanine, fumaric acid, GABA, malic acid, maltose-turanose, myo-inositol, maltitol, quinic acid, valine | Stress                        | Protein DETOXIFICATION                                        | AT4G25640 | x |
| Traes_1AL_4BF6C25E1 | up   | aconitic acid, citric acid, GABA, maltose-turanose, myo-inositol, quinic acid, ribose, shikimic acid, valine                                       | Others                        | Probable transmembrane GTPase FZO-like                        | AT1G03160 | x |
| Traes_1AL_1A98A80B4 | up   | aconitic acid, GABA myo-inositol, quinic acid, ribose, shikimic acid, valine                                                                       | C metabolism (photosynthesis) | Chlorophyll synthase, chloroplastic (EC 2.5.1.62)             | AT3G51820 | x |
| Traes_1BL_0FC423766 | up   | GABA, myo-inositol, maltitol, quinic acid, valine                                                                                                  | Others                        | 60S ribosomal protein L36                                     | AT5G02440 | x |
| Traes_1BL_714F4E4AC | up   | aconitic acid, GABA, maltose-turanose, myo-inositol, quinic acid, ribose, shikimic acid, valine                                                    | Stress                        | Carotene epsilon-monooxygenase, chloroplastic (EC 1.14.99.45) | AT3G53130 | x |
| Traes_1BL_8AC8D124C | up   | aconitic acid, citric acid, GABA, myo-inositol, quinic acid, ribose, shikimic acid, valine                                                         | Others                        | 50S ribosomal protein L1                                      | AT3G63490 | x |
| Traes_2AL_E7D1C8AA5 | up   | GABA, maltose-turanose, myo-inositol, maltitol, quinic acid, shikimic acid, valine                                                                 | transporter                   | Probable inositol transporter 2                               | AT1G30220 | x |

|                     |           |                                                                                                                    |                               |                                                                |                 |          |
|---------------------|-----------|--------------------------------------------------------------------------------------------------------------------|-------------------------------|----------------------------------------------------------------|-----------------|----------|
| Traes_2AL_FA3E7C60B | <i>up</i> | aconitic acid, GABA, isocitric acid, maltose-turanose, myo-inositol, maltitol, quinic acid, valine                 | Stress                        | Violaxanthin de-epoxidase, chloroplastic (VDE 1) (EC 1.23.5.1) | AT1G08550       | <b>x</b> |
| Traes_2AL_20BC426B9 | <i>up</i> | aconitic acid, aspartic acid, citric acid, GABA myo-inositol, maltitol quinic acid, ribose, valine                 | Stress                        | Peroxidase (EC 1.11.1.7)                                       | AT5G17820       | <b>x</b> |
| Traes_2AL_729CB1040 | <i>up</i> | GABA, myo-inositol quinic acid, ribose, valine                                                                     | C metabolism (glycolysis)     | Aldose 1-epimerase (EC 5.1.3.3)                                | AT3G17940       | <b>x</b> |
| Traes_2AL_E06A248EE | <i>up</i> | alanine, beta-alanine, fumaric acid, GABA myo-inositol, maltitol, quinic acid, ribose, shikimic acid, valine       | Stress                        | Glutathione peroxidase (EC 1.11.1.9)                           | AT2G48150       | <b>x</b> |
| Traes_2BL_363CA4ED8 | <i>up</i> | aconitic acid, alanine, GABA, maltose-turanose, myo-inositol, maltitol, quinic acid, ribose, shikimic acid, valine | C metabolism (photosynthesis) | Ferredoxin-3                                                   | AT2G27510       | <b>x</b> |
| Traes_2BS_FF8887BE5 | <i>up</i> | aconitic acid, citric acid, GABA, maltose-turanose, myo-inositol, quinic acid, ribose, shikimic acid, valine       | Others                        | Asparagine--tRNA ligase, chloroplastic/mitochondrial           | AT4G17300       | <b>x</b> |
| Traes_2BS_7135D68C5 | <i>up</i> | alanine, GABA, myo-inositol, maltitol, quinic acid, ribose                                                         | Others                        | Ribosomal protein L19                                          | AXX17-AT4G02830 | <b>x</b> |
| Traes_2BS_E5A5144E0 | <i>up</i> | alanine, fumaric acid GABA, maltitol, quinic acid, ribose                                                          | Others                        | tRNA (guanine(26)-N(2))-dimethyltransferase                    |                 | <b>x</b> |
| Traes_3AS_3CB8A9C01 | <i>up</i> | aconitic acid, GABA, myo-inositol, quinic acid ribose, valine                                                      | Amino acid metabolism         | Glutamate decarboxylase (EC 4.1.1.15)                          | AT1G65960       | <b>x</b> |
| Traes_3B_00CF2A894  | <i>up</i> | GABA, myo-inositol,                                                                                                | Stress                        | ATP-dependent Clp protease                                     | AT1G66670       | <b>x</b> |



|                     |    |                                                                                                                                                                  |               |                                                           |           |   |
|---------------------|----|------------------------------------------------------------------------------------------------------------------------------------------------------------------|---------------|-----------------------------------------------------------|-----------|---|
|                     |    | quinic acid, ribose,<br>shikimic acid, valine                                                                                                                    |               | proteolytic subunit 3 (EC<br>3.4.21.92)                   |           |   |
| Traes_4AL_497775E8F | up | alanine, beta-alanine<br>GABA, myo-inositol,<br>Maltitol, quinic acid,<br>ribose, shikimic acid,<br>valine                                                       | Stress        | Ferritin (EC 1.16.3.1)                                    | AT3G56090 | x |
| Traes_4BS_8D508569E | up | aconitic acid, GABA,<br>myo-inositol, quinic<br>acid, ribose, shikimic<br>acid, valine                                                                           | Others        | Pentatricopeptide repeat-<br>containing protein At3g06430 | AT3G06430 | x |
| Traes_5AL_955D2899A | up | aconitic acid, alanine<br>GABA, maltose-<br>turanose, myo-inositol<br>maltitol, quinic acid,<br>ribose, shikimic acid,<br>valine                                 | Stress        | Pectin acetylerase (EC 3.1.1.-)                           | AT5G23870 | x |
| Traes_5AS_6D0CC3B1F | up | GABA, maltose-<br>turanose, myo-<br>inositol,<br>Maltitol, quinic acid,<br>shikimic acid, valine                                                                 | Others        | 60S ribosomal protein L36                                 | AT5G02440 | x |
| Traes_5BL_304FAFA26 | up | GABA, myo-inositol,<br>maltitol, quinic acid,<br>ribose, valine                                                                                                  | Stress        | Lipoxygenase (EC 1.13.11.-)                               | AT3G45140 | x |
| Traes_6AL_D13D9D951 | up | aconitic acid, GABA,<br>maltose-turanose,<br>myo-inositol, maltitol,<br>quinic acid, ribose,<br>valine                                                           | <u>stress</u> | Serine carboxypeptidase-like<br>34(EC 3.4.16-)            | AT5G23210 | x |
| Traes_6AL_58B6B7319 | up | aconitic acid, alanine,<br>aspartic acid, citric<br>acid,<br>GABA, malic acid,<br>maltose-turanose,<br>myo-inositol, maltitol,<br>quinic acid, ribose,<br>valine | transporter   | Bidirectional sugar transporter<br>SWEET                  | AT3G16690 | x |
| Traes_6AS_0F0809F96 | up | aconitic acid, GABA,<br>maltose-turanose,<br>myo-inositol, maltitol,                                                                                             | stress        | Probable inactive linolenate<br>hydroperoxide lyase       | AT4G15440 | x |

|                     |    |                                                                                                                                                                                                                 |                        |                                                                |                  |   |
|---------------------|----|-----------------------------------------------------------------------------------------------------------------------------------------------------------------------------------------------------------------|------------------------|----------------------------------------------------------------|------------------|---|
|                     |    | quinic acid, ribose,<br>shikimic acid, valine                                                                                                                                                                   |                        |                                                                |                  |   |
| Traes_6AS_87906149C | up | aconitic acid, GABA,<br>maltose-turanose,<br>myo-inositol, quinic<br>acid, ribose, shikimic<br>acid, valine                                                                                                     | others                 | Protein Chlororespiratory<br>Reduction 6 (CRR6)                | AT2G47910        | x |
| Traes_7AL_356F6FF0E | up | aconitic acid, citric<br>acid, GABA, maltose-<br>turanose, myo-<br>inositol, maltitol,<br>valine                                                                                                                | others                 | Blue-light photoreceptor PHR2                                  | AT2G47590        | x |
| Traes_4AL_320703FD2 |    | aconitic acid, alanine,<br>aspartic acid, fumaric<br>acid, GABA, malic<br>acid,<br>myo-inositol, maltitol,<br>quinic acid, ribose,<br>valine                                                                    |                        |                                                                |                  |   |
| Traes_7AL_1B1FBCDE4 | up | aconitic acid, alanine,<br>beta-alanine, citric<br>acid,<br>GABA, malic acid<br>maltose-turanose,<br>myo-inositol,<br>maltitol, quinic acid,<br>ribose, valine                                                  | other C<br>metabolisms | Xyloglucan<br>endotransglucosylase/hydrolase<br>(EC 2.4.1.207) | AT2G06850        | x |
| Traes_7AL_8C4A9BEBF |    | aconitic acid, alanine,<br>aspartic acid, b-<br>alanine,<br>citric acid, fumaric<br>acid,<br>GABA, malic acid,<br>maltose-turanose,<br>myo-inositol, maltitol,<br>quinic acid, ribose,<br>shikimic acid, valine |                        |                                                                |                  |   |
| Traes_7AS_020CCE3DB | up | aconitic acid, citric<br>acid, GABA, maltose-<br>turanose, myo-<br>inositol, maltitol,                                                                                                                          | Stress                 | Peroxiredoxin Q, chloroplastic<br>(EC 1.11.1.15)               | <u>AT3G26060</u> | x |

|                     |           |                                                                                                                                                                 |                                      |                                                                     |                     |          |
|---------------------|-----------|-----------------------------------------------------------------------------------------------------------------------------------------------------------------|--------------------------------------|---------------------------------------------------------------------|---------------------|----------|
|                     |           | quinic acid, ribose,<br>valine                                                                                                                                  |                                      |                                                                     |                     |          |
| Traes_7AS_545BDB6F1 | <i>up</i> | aconitic acid, GABA,<br>maltose-turanose,<br>myo-inositol, quinic<br>acid, ribose, shikimic<br>acid, valine                                                     | Others                               | Alanine--tRNA ligase,<br>chloroplatic/mitochondrial (EC<br>6.1.1.7) | AT5G22800           | <b>x</b> |
| Traes_7BL_A42D6C984 | <i>up</i> | aconitic acid, GABA,<br>maltose-turanose,<br>myo-inositol, maltitol,<br>quinic acid, ribose,<br>valine                                                          | Stress                               | Superoxidedismutase [Cu-Zn] 2<br>(EC 1.15.1.1) SOD2                 | AT2G28190           | <b>x</b> |
| Traes_7BL_B5491A48C | <i>up</i> | aconitic acid, alanine,<br>citric acid, GABA,<br>malic acid, maltose-<br>turanose, myo-<br>inositol, maltitol,<br>quinic acid, ribose,<br>shikimic acid, valine | Amino acid<br>metabolism             | D-3-phosphoglycerate<br>dehydrogenase (EC 1.1.1.95)                 | AXX17-<br>AT4G39120 | <b>x</b> |
| Traes_7BL_C35CD97E7 | <i>up</i> | aconitic acid, alanine,<br>citric acid, GABA,<br>maltose-turanose,<br>myo-inositol, maltitol,<br>quinic acid, ribose,<br>shikimic acid, valine                  | C metabolism<br>(photosynthes<br>is) | Delta-aminolevulinic acid<br>dehydratase (EC 4.2.1.24)              | AXX17-<br>AT1G63860 | <b>x</b> |
