# Supplementary material for: Comparative Analysis Based on Transcriptomics and Metabolomics Data Reveal Differences between Emmer and Durum Wheat in Response to Nitrogen Starvation
Source: MDPI journal article supplement (doi:10.3390/ijms22094790), 2021-04-30
Supplement: s1 [file s1]

**Table S9.** DEGs of networks affected by environment.

|                                                   | DEGs                | (-N) | (+N) |
|---------------------------------------------------|---------------------|------|------|
| <b>Common central role in both network</b>        | Traes_2BL_CCD296233 | up   | up   |
| <b>Common central role in durum wheat network</b> | Traes_5BL_BD895CF84 | down |      |
| <b>Common central role in emmer network</b>       | Traes_2AS_F485758C1 | down | down |
|                                                   | Traes_6AS_FD8F6B539 | down |      |
| <b>Specific durum wheat network</b>               | Traes_1BL_9772C6F45 | down |      |
|                                                   | Traes_2BS_7135D68C5 | up   |      |
|                                                   | Traes_2AL_20BC426B9 |      | down |
|                                                   | Traes_5AL_07C125B1C |      | up   |
|                                                   | Traes_5BL_FF9AA4B58 |      | up   |
|                                                   | Traes_6AS_0C1D497EA |      | up   |
|                                                   | Traes_7AL_1B1FBCDE4 | down | down |
| <b>Specific emmer network</b>                     | Traes_1AL_5F0F4FAFB | up   |      |
|                                                   | Traes_1AL_8E8E7401B | down |      |
|                                                   | Traes_2AS_34272605C | down |      |
|                                                   | Traes_4AS_4C25DF6F4 | down |      |
|                                                   | Traes_7AS_9A01E6B17 | up   |      |
|                                                   | Traes_7AS_A80BE362A | down |      |
