# Supplementary material for: Comparative Analysis Based on Transcriptomics and Metabolomics Data Reveal Differences between Emmer and Durum Wheat in Response to Nitrogen Starvation
Source: MDPI journal article supplement (doi:10.3390/ijms22094790), 2021-04-30
Supplement: s1 [file s1]

**Table S3.** Number of DEGs (up-/down-regulated) under two N conditions, enriched GO terms before and after FDR correction in emmer (Molise Sel. Colli), durum wheat (Simeto), and in total.

| <b>Genotypes</b>             | <b>up/<br/>down</b> | <b>DE genes</b> | <b>GO enriched</b> | <b>Filtered GO<br/>(FDR)</b> |
|------------------------------|---------------------|-----------------|--------------------|------------------------------|
| emmer<br>(Molise Sel. Colli) | up                  | 1202            | 486                | 390                          |
|                              | down                | 586             | 116                | 94                           |
| durum wheat<br>(Simeto)      | up                  | 1846            | 621                | 477                          |
|                              | down                | 1283            | 239                | 178                          |
| total                        | up                  | 3048            | 1107               | 867                          |
|                              | down                | 1869            | 355                | 272                          |
