# Supplementary figures and images for: Comparative Analysis Based on Transcriptomics and Metabolomics Data Reveal Differences between Emmer and Durum Wheat in Response to Nitrogen Starvation
Source: MDPI journal article supplement (doi:10.3390/ijms22094790), 2021-04-30

Figure S2.

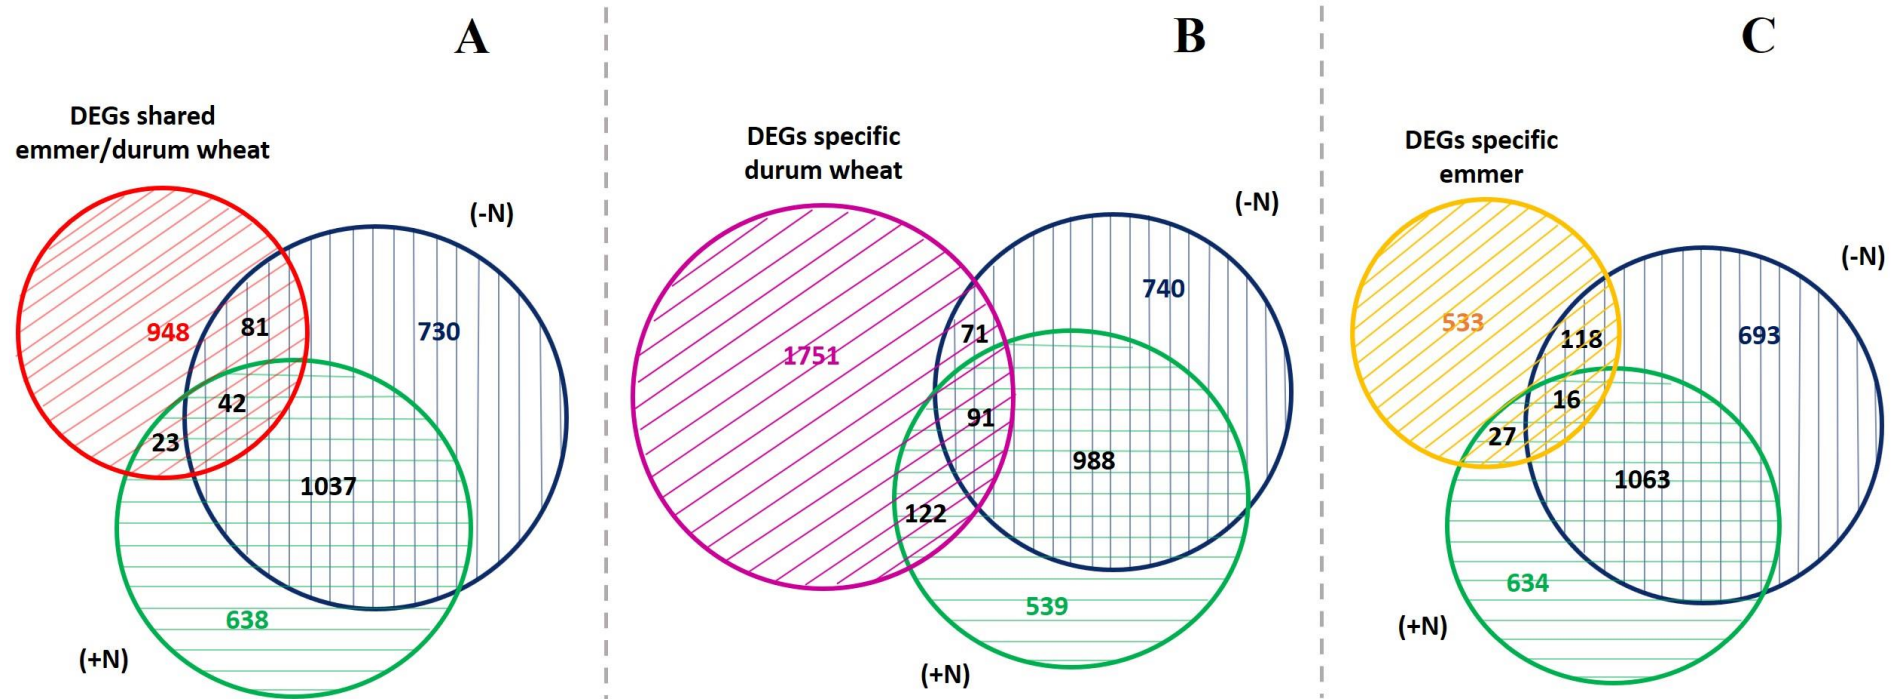

Supplement: s1 [file s1]
